# Supplementary material
Source: PubMed Central journal article supplement (PMC2720253)
Supplement: NIHMS121694-supplement-Supplementary_Data.pdf [file NIHMS121694-supplement-Supplementary_Data.pdf]

SUPPLEMENTAL FIGURES

Figure S1: Dopamine D1 null mice have increased locomotor behavior in the novel open field task.

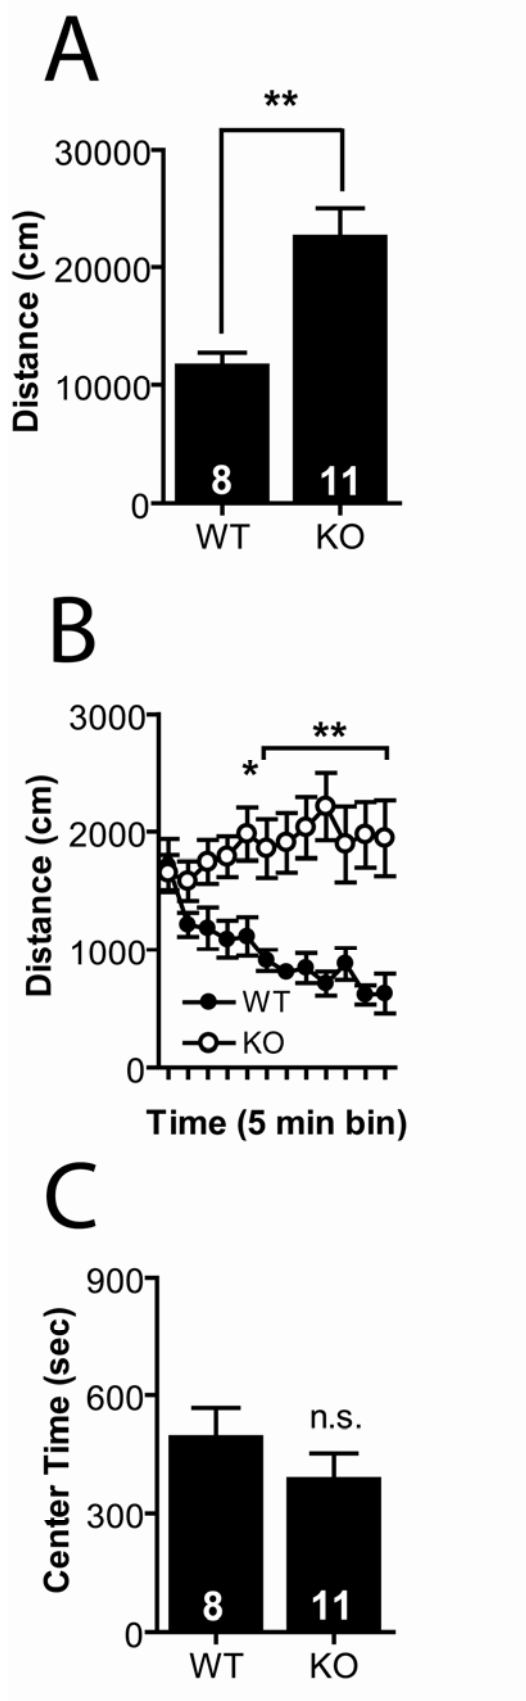

Figure S2: Novel open field activity does not correlate with OSS performance.

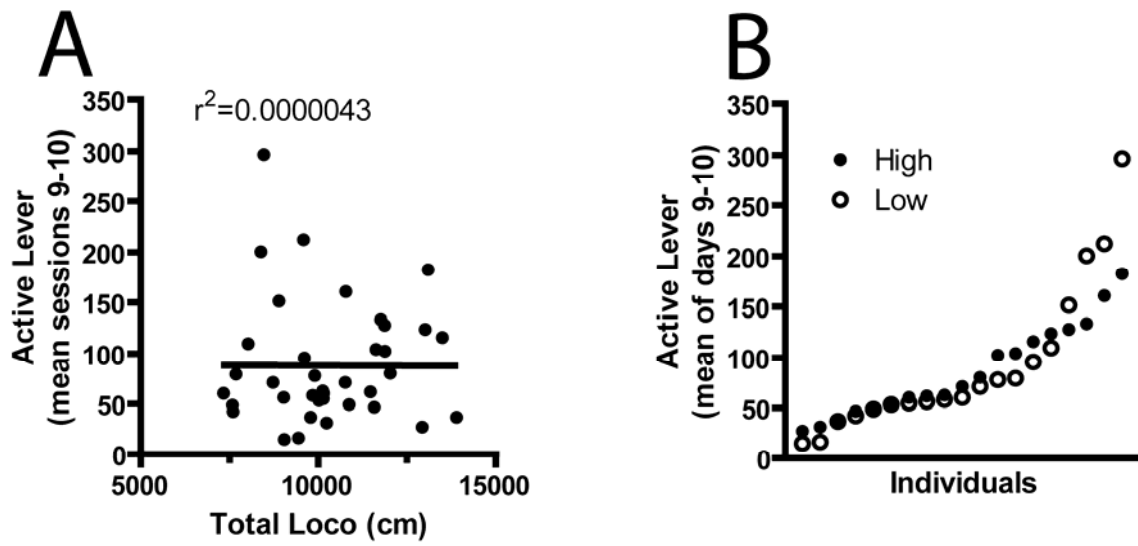

## SUPPLEMENTAL FIGURE CAPTIONS

**Figure S1: D1 null and wildtype littermates in the novel open field task.** (a) D1 null mice had elevated total locomotor activity during a one hour novel open field task. (b) Locomotor data in 5-min intervals identifies lack of habituation as a factor in the D1 null elevated total locomotor activity, an effect previously reported (for review, see (Holmes *et al.*, 2004)). (c) There was no significant difference in center time between D1 null and WT. (\* $p < 0.05$ , \*\* $p < 0.01$ )

**Figure S2: Novel open field activity does not correlate with OSS performance.** (a) Total locomotor activity in the novel open field does not correlate with active lever pressing after acquisition of OSS. (b) OSS active lever pressing in individuals subject to median split based on locomotor activity (n=19 per group).

## REFERENCE

Holmes A, Lachowicz JE and Sibley DR (2004). Phenotypic analysis of dopamine receptor knockout mice; recent insights into the functional specificity of dopamine receptor subtypes. *Neuropharmacology* 47: 1117-34.
